# Supplementary material for: Propensity to seek healthcare in different healthcare systems: analysis of patient data in 34 countries
Source: Springer Nature journal article supplement (doi:10.1186/s12913-015-1119-2), 2015-06-01
Supplement: MOESM2 [file 9757814]

**Additional file 2: Step-by-step results of multilevel regression analyses**

| 'Severe' complaints (scale 0-10) | Model-0 |         |      | Model-1 |         |      | Model-2 |         |      |
|----------------------------------|---------|---------|------|---------|---------|------|---------|---------|------|
|                                  | B       | LB      | UB   | B       | LB      | UB   | B       | LB      | UB   |
| <b>Intercept</b>                 | 7.56‡   | 7.40    | 7.72 | 7.46‡   | 7.30    | 7.62 | 7.49    | 7.32    | 7.65 |
| <b>Need factor</b>               |         |         |      |         |         |      |         |         |      |
| General health                   |         |         |      |         |         |      |         |         |      |
| -very good (ref)                 |         |         |      |         |         |      |         |         |      |
| -good                            |         |         |      | 0.07‡   | 0.05    | 0.10 | 0.02    | -0.004  | 0.05 |
| -fair                            |         |         |      | 0.15‡   | 0.12    | 0.17 | 0.04‡   | 0.01    | 0.07 |
| -poor                            |         |         |      | 0.23‡   | 0.20    | 0.27 | 0.10‡   | 0.06    | 0.14 |
| <b>Predisposing factors</b>      |         |         |      |         |         |      |         |         |      |
| Age/10*                          |         |         |      |         |         |      | 0.07‡   | 0.06    | 0.07 |
| Sex                              |         |         |      |         |         |      |         |         |      |
| - female                         |         |         |      |         |         |      | 0.05‡   | 0.03    | 0.07 |
| Ethnicity                        |         |         |      |         |         |      |         |         |      |
| - native(ref)                    |         |         |      |         |         |      |         |         |      |
| -second generation               |         |         |      |         |         |      | 0.01    | -0.04   | 0.05 |
| -first generation                |         |         |      |         |         |      | 0.05‡   | 0.01    | 0.08 |
| Educational attainment           |         |         |      |         |         |      |         |         |      |
| -low (ref)                       |         |         |      |         |         |      |         |         |      |
| -middle                          |         |         |      |         |         |      | 0.02    | -0.004  | 0.04 |
| -high                            |         |         |      |         |         |      | -0.01   | -0.03   | 0.02 |
| <b>Enabling factors</b>          |         |         |      |         |         |      |         |         |      |
| Household income                 |         |         |      |         |         |      |         |         |      |
| Below average (ref)              |         |         |      |         |         |      |         |         |      |
| Around average                   |         |         |      |         |         |      |         |         |      |
| Above average                    |         |         |      |         |         |      |         |         |      |
| Urbanization                     |         |         |      |         |         |      |         |         |      |
| Big city (ref)                   |         |         |      |         |         |      |         |         |      |
| Suburbs, Town                    |         |         |      |         |         |      |         |         |      |
| Urban-rural, Rural               |         |         |      |         |         |      |         |         |      |
| Access-scale (0-10)*             |         |         |      |         |         |      |         |         |      |
| Communication-scale (0-10)*      |         |         |      |         |         |      |         |         |      |
| Continuity-scale (0-10)*         |         |         |      |         |         |      |         |         |      |
| <b>Health system</b>             |         |         |      |         |         |      |         |         |      |
| GDP (ppp) per capita/1000*       |         |         |      |         |         |      |         |         |      |
| Health care system               |         |         |      |         |         |      |         |         |      |
| SHI (ref)                        |         |         |      |         |         |      |         |         |      |
| NHS                              |         |         |      |         |         |      |         |         |      |
| Transitional                     |         |         |      |         |         |      |         |         |      |
| <b>Variance Country (SE)</b>     | 0.221   | (0.054) |      | 0.222   | (0.054) |      | 0.224   | (0.054) |      |
| <b>Variance Practice (SE)</b>    | 0.226   | (0.006) |      | 0.226   | (0.006) |      | 0.225   | (0.006) |      |
| <b>Variance Patient (SE)</b>     | 0.991   | (0.006) |      | 0.987   | (0.006) |      | 0.969   | (0.006) |      |
| <b>ICC country level</b>         |         | 0.15    |      |         | 0.15    |      |         | 0.16    |      |
| <b>ICC practice level</b>        |         | 0.16    |      |         | 0.16    |      |         | 0.16    |      |
| <b>N (country)</b>               |         | 34      |      |         | 34      |      |         | 34      |      |
| <b>N (practice)</b>              |         | 7006    |      |         | 7006    |      |         | 7005    |      |
| <b>N (patient)</b>               |         | 60853   |      |         | 60517   |      |         | 58729   |      |

\* Variables are centered around grand mean, † P<0.05 ‡p<0.001

B=beta coefficient, LB= lower limit, UB=upper limit, ICC=intraclass correlation, ref=reference category

| 'Severe' complaints (scale 0-10) | Model-3 |         |       | Model-4 (final) |         |       |
|----------------------------------|---------|---------|-------|-----------------|---------|-------|
|                                  | B       | LB      | UB    | B               | LB      | UB    |
| <b>Intercept</b>                 | 7.50‡   | 7.34    | 7.67  | 7.69‡           | 7.35    | 8.03  |
| <b>Need factor</b>               |         |         |       |                 |         |       |
| General health                   |         |         |       |                 |         |       |
| -very good (ref)                 |         |         |       |                 |         |       |
| -good                            | 0.01    | -0.01   | 0.04  | 0.01            | -0.01   | 0.04  |
| -fair                            | 0.03    | -0.001  | 0.06  | 0.03            | -0.001  | 0.06  |
| -poor                            | 0.10‡   | 0.07    | 0.14  | 0.10‡           | 0.06    | 0.14  |
| <b>Predisposing factors</b>      |         |         |       |                 |         |       |
| Age/10*                          | 0.06‡   | 0.05    | 0.07  | 0.06‡           | 0.05    | 0.07  |
| Sex                              |         |         |       |                 |         |       |
| - female                         | 0.05‡   | 0.03    | 0.06  | 0.05‡           | 0.03    | 0.06  |
| Ethnicity                        |         |         |       |                 |         |       |
| - native(ref)                    |         |         |       |                 |         |       |
| -second generation               | 0.003   | -0.04   | 0.05  | 0.004           | -0.04   | 0.05  |
| -first generation                | 0.07‡   | 0.03    | 0.10  | 0.07‡           | 0.03    | 0.10  |
| Educational attainment           |         |         |       |                 |         |       |
| -low (ref)                       |         |         |       |                 |         |       |
| -middle                          | 0.01    | -0.02   | 0.03  | 0.01            | -0.02   | 0.03  |
| -high                            | -0.03   | -0.05   | 0.001 | -0.03           | -0.05   | 0.001 |
| <b>Enabling factors</b>          |         |         |       |                 |         |       |
| Household income                 |         |         |       |                 |         |       |
| Below average (ref)              |         |         |       |                 |         |       |
| Around average                   | 0.02    | -0.003  | 0.03  | 0.02            | -0.003  | 0.04  |
| Above average                    | 0.03    | -0.002  | 0.06  | 0.03            | -0.002  | 0.06  |
| Urbanization                     |         |         |       |                 |         |       |
| Big city (ref)                   |         |         |       |                 |         |       |
| Suburbs, Town                    | -0.005  | -0.04   | 0.03  | -0.005          | -0.04   | 0.03  |
| Urban-rural, Rural               | 0.02    | -0.05   | 0.02  | -0.02           | -0.05   | 0.02  |
| Access-scale (0-10)*             | 0.14‡   | 0.11    | 0.17  | 0.14‡           | 0.11    | 0.17  |
| Communication-scale (0-10)*      | 0.11‡   | 0.06    | 0.16  | 0.11‡           | 0.06    | 0.16  |
| Continuity-scale (0-10)*         | 0.37‡   | 0.32    | 0.41  | 0.37‡           | 0.32    | 0.41  |
| <b>Health system</b>             |         |         |       |                 |         |       |
| GDP (ppp) per capita/1000*       |         |         |       | -0.02‡          | -0.03   | -0.01 |
| Health care system               |         |         |       |                 |         |       |
| SHI (ref)                        |         |         |       |                 |         |       |
| NHS                              |         |         |       | -0.03           | -0.40   | 0.35  |
| Transitional                     |         |         |       | -0.50†          | -0.98   | -0.01 |
| <b>Variance Country (SE)</b>     | 0.224   | (0.055) |       | 0.161           | (0.040) |       |
| <b>Variance Practice (SE)</b>    | 0.221   | (0.006) |       | 0.221           | (0.006) |       |
| <b>Variance Patient (SE)</b>     | 0.956   | (0.006) |       | 0.956           | (0.006) |       |
| <b>Variance country (ICC)</b>    |         | 0.16    |       |                 | 0.12    |       |
| <b>Variance practice (ICC)</b>   |         | 0.16    |       |                 | 0.17    |       |
| <b>N (country)</b>               |         | 34      |       |                 | 34      |       |
| <b>N( practice)</b>              |         | 6784    |       |                 | 6784    |       |
| <b>N (patient)</b>               |         | 55937   |       |                 | 55937   |       |

\* Variables are centered around grand mean, † P<0.05 ‡p<0.001

B=beta coefficient, LB= lower limit, UB=upper limit, ICC=intraclass correlation, ref=reference category

| 'Minor' complaints (scale 0-10) | Model-0 |       |      | Model-1 |         |      | Model-2 |         |       |
|---------------------------------|---------|-------|------|---------|---------|------|---------|---------|-------|
|                                 | B       | LB    | UB   | B       | LB      | UB   | B       | LB      | UB    |
| <b>Intercept</b>                | 8.19‡   | 7.90  | 8.48 | 8.02‡   | 7.73    | 8.31 | 7.99‡   | 7.69    | 8.28  |
| <b>Need factor</b>              |         |       |      |         |         |      |         |         |       |
| General health                  |         |       |      |         |         |      |         |         |       |
| -very good (ref)                |         |       |      |         |         |      |         |         |       |
| -good                           |         |       |      | 0.15‡   | 0.11    | 0.20 | 0.13‡   | 0.08    | 0.17  |
| -fair                           |         |       |      | 0.24‡   | 0.19    | 0.29 | 0.18‡   | 0.13    | 0.23  |
| -poor                           |         |       |      | 0.26‡   | 0.19    | 0.32 | 0.19‡   | 0.12    | 0.26  |
| <b>Predisposing factors</b>     |         |       |      |         |         |      |         |         |       |
| Age/10*                         |         |       |      |         |         |      | 0.02‡   | 0.01    | 0.03  |
| Sex                             |         |       |      |         |         |      |         |         |       |
| - female                        |         |       |      |         |         |      | 0.16‡   | 0.13    | 0.19  |
| Ethnicity                       |         |       |      |         |         |      |         |         |       |
| - native(ref)                   |         |       |      |         |         |      |         |         |       |
| -second generation              |         |       |      |         |         |      | -0.08†  | -0.16   | -0.01 |
| -first generation               |         |       |      |         |         |      | -0.01   | -0.08   | 0.05  |
| Educational attainment          |         |       |      |         |         |      |         |         |       |
| -low (ref)                      |         |       |      |         |         |      |         |         |       |
| -middle                         |         |       |      |         |         |      | -0.003  | -0.04   | 0.04  |
| -high                           |         |       |      |         |         |      | -0.07‡  | -0.11   | -0.02 |
| <b>Enabling factors</b>         |         |       |      |         |         |      |         |         |       |
| Household income                |         |       |      |         |         |      |         |         |       |
| Below average (ref)             |         |       |      |         |         |      |         |         |       |
| Around average                  |         |       |      |         |         |      |         |         |       |
| Above average                   |         |       |      |         |         |      |         |         |       |
| Urbanization                    |         |       |      |         |         |      |         |         |       |
| Big city (ref)                  |         |       |      |         |         |      |         |         |       |
| Suburbs, Town                   |         |       |      |         |         |      |         |         |       |
| Urban-rural, Rural              |         |       |      |         |         |      |         |         |       |
| Access-scale (0-10)*            |         |       |      |         |         |      |         |         |       |
| Communication-scale (0-10)*     |         |       |      |         |         |      |         |         |       |
| Continuity-scale (0-10)*        |         |       |      |         |         |      |         |         |       |
| <b>Health system</b>            |         |       |      |         |         |      |         |         |       |
| GDP (ppp) per capita/1000*      |         |       |      |         |         |      |         |         |       |
| Health care system              |         |       |      |         |         |      |         |         |       |
| SHI (ref)                       |         |       |      |         |         |      |         |         |       |
| NHS                             |         |       |      |         |         |      |         |         |       |
| Transitional                    |         |       |      |         |         |      |         |         |       |
| <b>Variance Country (SE)</b>    | 0.735   | 0.180 |      | 0.734   | (0.180) |      | 0.745   | (0.183) |       |
| <b>Variance Practice (SE)</b>   | 0.839   | 0.021 |      | 0.836   | (0.021) |      | 0.839   | (0.021) |       |
| <b>Variance Patient (SE)</b>    | 3.322   | 0.020 |      | 3.311   | (0.020) |      | 3.274   | (0.020) |       |
| <b>Variance country (ICC)</b>   |         | 0.15  |      |         | 0.15    |      |         | 0.15    |       |
| <b>Variance practice (ICC)</b>  |         | 0.17  |      |         | 0.17    |      |         | 0.17    |       |
| <b>N (country)</b>              |         | 34    |      |         | 34      |      |         | 34      |       |
| <b>N( practice)</b>             |         | 7005  |      |         | 7005    |      |         | 7005    |       |
| <b>N (patient)</b>              |         | 60236 |      |         | 59903   |      |         | 58156   |       |

\* Variables are centered around grand mean, † P<0.05 ‡p<0.001

B=beta coefficient, LB= lower limit, UB=upper limit, ICC=intraclass correlation, ref=reference category

| 'Minor' complaints (scale 0-10) | Model-3 |        |         | Model-4 (final) |         |       |
|---------------------------------|---------|--------|---------|-----------------|---------|-------|
|                                 | B       | LB     | UB      | B               | LB      | UB    |
| <b>Intercept</b>                | 8.01‡   | 7.72   | 8.31    | 8.33‡           | 7.66    | 9.00  |
| <b>Need factor</b>              |         |        |         |                 |         |       |
| General health                  |         |        |         |                 |         |       |
| -very good (ref)                |         |        |         |                 |         |       |
| -good                           | 0.10‡   | 0.05   | 0.15    | 0.10‡           | 0.05    | 0.15  |
| -fair                           | 0.15‡   | 0.10   | 0.21    | 0.15‡           | 0.10    | 0.21  |
| -poor                           | 0.19‡   | 0.11   | 0.26    | 0.19‡           | 0.11    | 0.26  |
| <b>Predisposing factors</b>     |         |        |         |                 |         |       |
| Age/10*                         | 0.01    | -0.005 | 0.02    | 0.01            | -0.004  | 0.02  |
| Sex                             |         |        |         |                 |         |       |
| - female                        | 0.14‡   | 0.11   | 0.17    | 0.14‡           | 0.11    | 0.17  |
| Ethnicity                       |         |        |         |                 |         |       |
| - native(ref)                   |         |        |         |                 |         |       |
| -second generation              | -0.06   | -0.14  | 0.02    | -0.06           | -0.14   | 0.02  |
| -first generation               | 0.04    | -0.02  | 0.10    | 0.04            | -0.02   | 0.10  |
| Educational attainment          |         |        |         |                 |         |       |
| -low (ref)                      |         |        |         |                 |         |       |
| -middle                         | -0.02   | -0.07  | 0.02    | -0.02           | -0.07   | 0.02  |
| -high                           | -0.09‡  | -0.14  | -0.04   | -0.09‡          | -0.14   | 0.04  |
| <b>Enabling factors</b>         |         |        |         |                 |         |       |
| Household income                |         |        |         |                 |         |       |
| Below average (ref)             |         |        |         |                 |         |       |
| Around average                  | 0.04    | -0.002 | 0.07    | 0.04            | -0.002  | 0.07  |
| Above average                   | -0.06‡  | -0.12  | -0.001  | -0.06‡          | -0.12   | 0.001 |
| Urbanization                    |         |        |         |                 |         |       |
| Big city (ref)                  |         |        |         |                 |         |       |
| Suburbs, Town                   | -0.02   | -0.08  | 0.05    | -0.01           | -0.08   | 0.05  |
| Urban-rural, Rural              | 0.03    | -0.04  | 0.10    | 0.03            | -0.04   | 0.10  |
| Access-scale (0-10)*            | 0.35‡   | 0.30   | 0.41    | 0.35‡           | 0.30    | 0.41  |
| Communication-scale (0-10)*     | 0.45‡   | 0.35   | 0.55    | 0.45‡           | 0.35    | 0.55  |
| Continuity-scale (0-10)*        | 0.65‡   | 0.56   | 0.73    | 0.65‡           | 0.56    | 0.73  |
| <b>Health system</b>            |         |        |         |                 |         |       |
| GDP (ppp) per capita/1000*      |         |        |         | -0.02           | -0.05   | 0.003 |
| Health care system              |         |        |         |                 |         |       |
| SHI (ref)                       |         |        |         |                 |         |       |
| NHS                             |         |        |         | -0.47           | -1.20   | 0.27  |
| Transitional                    |         |        |         | -0.24           | -1.19   | 0.71  |
| <b>Variance Country (SE)</b>    |         | 0.733  | (0.180) | 0.617           | (0.152) |       |
| <b>Variance Practice (SE)</b>   |         | 0.822  | (0.021) | 0.822           | (0.021) |       |
| <b>Variance Patient (SE)</b>    |         | 3.199  | (0.021) | 3.199           | (0.021) |       |
| <b>Variance country (ICC)</b>   |         | 0.15   |         | 0.13            |         |       |
| <b>Variance practice (ICC)</b>  |         | 0.17   |         | 0.18            |         |       |
| <b>N (country)</b>              |         | 34     |         | 34              |         |       |
| <b>N( practice)</b>             |         | 6785   |         | 6785            |         |       |
| <b>N (patient)</b>              |         | 55417  |         | 55417           |         |       |

\* Variables are centered around grand mean, † P<0.05 ‡p<0.001

B=beta coefficient, LB= lower limit, UB=upper limit, ICC=intraclass correlation, ref=reference category
