# Supplementary material for: Propensity to seek healthcare in different healthcare systems: analysis of patient data in 34 countries
Source: Springer Nature journal article supplement (doi:10.1186/s12913-015-1119-2), 2015-06-01
Supplement: MOESM3 [file 9757814]

**Additional file 3: Description of variables included in negative binomial regression analyses**

| Dependent variables          |                                                                                          | N  | Included countries                                                                                                          | Year      | Source                       | Mean (range)           | SD    |
|------------------------------|------------------------------------------------------------------------------------------|----|-----------------------------------------------------------------------------------------------------------------------------|-----------|------------------------------|------------------------|-------|
| Avoidable hospitalizations   | Asthma admission rate per 100.000 population (age-sex stand.)                            | 25 | AUT, BEL, CZE, DNK, FIN, DEU, HUN, ISL, IRL, ITA, LVA, LUX, NLD, NOR, POL, PRT, SVK, SVN, ESP, SWE, CHE, ENG, AUS, CAN, NZL | 2009-2012 | OECD                         | 48.7<br>(11.4-150.9)   | 34.1  |
|                              | COPD admission rate per 100.000 population (age-sex stand.)                              | 25 | AUT, BEL, CZE, DNK, FIN, DEU, HUN, ISL, IRL, ITA, LVA, LUX, NLD, NOR, POL, PRT, SVK, SVN, ESP, SWE, CHE, ENG, AUS, CAN, NZL | 2009-2012 | OECD                         | 209<br>(70.5-365.0)    | 82.5  |
|                              | Diabetes: Short-term complication admission rate per 100.000 population (age-sex stand.) | 23 | AUT, BEL, CZE, DNK, FIN, DEU, HUN, ISL, IRL, ITA, LVA, NLD, NOR, POL, PRT, SVN, ESP, SWE, CHE, ENG, AUS, CAN, NZL           | 2009-2012 | OECD                         | 18.3 (7.8-37.5)        | 7.8   |
|                              | Diabetes: Long-term complication admission rate per 100.000 population (age-sex stand.)  | 23 | AUT, BEL, CZE, DNK, FIN, DEU, HUN, ISL, IRL, ITA, LVA, NLD, NOR, POL, PRT, SVN, ESP, SWE, CHE, ENG, AUS, CAN, NZL           | 2009-2012 | OECD                         | 87.6 (19.4-249.9)      | 61.4  |
|                              | Uncontrolled diabetes admission rate per 100.000 population (age-sex stand.)             | 21 | AUT, BEL, CZE, DNK, FIN, DEU, HUN, ISL, IRL, ITA, LVA, NOR, POL, PRT, ESP, SWE, CHE, ENG, AUS, CAN, NZL                     | 2009-2012 | OECD                         | 43.2 (7.2-180.7)       | 40.5  |
|                              | Congestive heart failure admission rate per 100.000 population (age-sex stand.)          | 24 | AUT, BEL, CZE, DNK, FIN, DEU, HUN, ISL, IRL, ITA, LVA, NLD, NOR, POL, PRT, SVK, SVN, ESP, SWE, CHE, ENG, AUS, CAN, NZL      | 2009-2012 | OECD                         | 245.16<br>(56.5-595.4) | 122.7 |
| <b>Independent variables</b> |                                                                                          |    |                                                                                                                             |           |                              |                        |       |
| Hospital beds                | Number of hospital beds per 100.000 population                                           | 25 | AUT, BEL, CZE, DNK, FIN, DEU, HUN, ISL, IRL, ITA, LVA, LUX, NLD, NOR, POL, PRT, SVK, SVN, ESP, SWE, CHE, ENG, AUS, CAN, NZL | 2009-2012 | OECD                         | 4.6 (2.5-8.3)          | 1.7   |
| Asthma prevalence            | Population aged 15+ with asthma (%) (age-sex stand.)                                     | 19 | AUT, BEL, CZE, DNK, FIN, DEU, HUN, IRL, ITA, LVA, LUX, NLD, POL, PRT, SVK, SVN, ESP, SWE, ENG                               | 2007-2010 | Eurostat Statistics Database | 6.5 (2-11)             | 3.2   |
| COPD prevalence              | Population aged 15+ with COPD (%) (age-sex stand.)                                       | 19 | AUT, BEL, CZE, DNK, FIN, DEU, HUN, IRL, ITA, LVA, LUX, NLD, POL, PRT, SVK, SVN, ESP, SWE, ENG                               | 2007-2009 | Eurostat Statistics Database | 20.8 (13.1-31.9)       | 4.5   |
| Diabetes prevalence          | Population aged 20–79 with diabetes (%) (age stand.)                                     | 23 | AUT, BEL, CZE, DNK, FIN, DEU, HUN, ISL, IRL, ITA, LVA, NLD, NOR, POL, PRT, SVN, ESP, SWE, CHE, ENG, AUS, CAN, NZL           | 2011      | IDF                          | 6.5 (3.2-14.9)         | 2.3   |
| Smoking                      | population aged 15+ daily smokers (%)                                                    | 18 | AUT, BEL, CZE, DNK, FIN, DEU, HUN, IRL, ITA, LUX, NLD, POL, PRT, SVK, SVN, ESP, SWE, ENG                                    | 2006-2012 | OECD                         | 6.49 (3.2-14.9)        | 2.3   |
